# Supplementary material for: Valorization of Opuntia dillenii biomass into a reusable bio-based composite for sustainable and efficient methyl orange adsorption
Source: Royal Society of Chemistry journal article supplement (doi:10.1039/d6ra02331b), 2026-05-18
Supplement: d6ra02331b1.pdf [file d6ra02331b1.pdf]

## SUPPLEMENTARY INFORMATION

### **Valorization of *Opuntia dillenii* biomass into a reusable bio-based composite for sustainable and efficient methyl orange adsorption**

Thi-Kim-Chi Huynh,<sup>\*ab</sup> Thi-Hong-An Nguyen,<sup>†a</sup> Cong-Hau Huynh,<sup>†c</sup> Xuan-Ngoc Nguyen,<sup>ad</sup> Thi-Cam-Thu Nguyen,<sup>a</sup> Hoang-Phuc Nguyen,<sup>a</sup> Anh-Khoa Ton,<sup>ae</sup> Thanh-Danh Nguyen,<sup>a</sup> Thi Be Ta Truong,<sup>c</sup> Nguyen Thi Thanh Tu,<sup>f</sup> Chien Phuong Tran<sup>g</sup> and Thi-Kim-Dung Hoang<sup>ab</sup>

<sup>a</sup>Institute of Advanced Technology, Vietnam Academy of Science and Technology, No. 1B, TL29 Street, An Phu Dong Ward, Ho Chi Minh City, Vietnam  
E-mail: [maihuyhn1224@gmail.com](mailto:maihuyhn1224@gmail.com)

<sup>b</sup>Graduate University of Science and Technology - Vietnam Academy of Science and Technology - No.18, Hoang Quoc Viet Street, Nghia Do Ward, Hanoi, Vietnam

<sup>c</sup>Group of Applied Research in Advanced Materials for Sustainable Development, Faculty of Applied Sciences, Ton Duc Thang University, Ho Chi Minh City, Vietnam

<sup>d</sup>Ho Chi Minh University of Technology-Vietnam National University, Vietnam

<sup>e</sup>Faculty of Health Sciences, Mekong University, Vinh Long Province, Vietnam

<sup>f</sup>Faculty of Applied Technology, Van Lang School of Technology, Van Lang University, Ho Chi Minh City, Vietnam

<sup>g</sup>Institute for Tropical Technology

<sup>†</sup>These authors contributed equally

## FIGURE CAPTIONS

|                                                        |    |
|--------------------------------------------------------|----|
| Figure S1. FTIR spectrum of SPCA .....                 | 3  |
| Figure S2. FTIR spectrum of activated carbon .....     | 4  |
| Figure S3. FTIR spectrum of chitosan .....             | 5  |
| Figure S4. FTIR spectrum of pectin cactus .....        | 6  |
| Figure S5. FTIR spectrum of alginate .....             | 7  |
| Figure S6. X-ray diffraction of SPCA .....             | 8  |
| Figure S7. X-ray diffraction of activated carbon ..... | 9  |
| Figure S8. X-ray diffraction of chitosan .....         | 10 |
| Figure S9. X-ray diffraction of pectin cactus .....    | 11 |
| Figure S10. X-ray diffraction of alginate .....        | 12 |
| Figure S11. TGA of SPCA .....                          | 13 |
| Figure S12. TGA of activated carbon .....              | 14 |
| Figure S13. TGA of chitosan .....                      | 15 |
| Figure S14. TGA of pectin cactus .....                 | 16 |
| Figure S15. TGA of alginate .....                      | 17 |
| Figure S16. DSC of SPCA .....                          | 18 |
| Figure S17. DSC of activated carbon .....              | 19 |
| Figure S18. DSC of chitosan .....                      | 20 |
| Figure S19. DSC of pectin cactus .....                 | 21 |
| Figure S20. DSC of alginate .....                      | 22 |

## TABLE CAPTIONS

|                                                                                                                                                                    |    |
|--------------------------------------------------------------------------------------------------------------------------------------------------------------------|----|
| Table S1. Surface area, pore volume and pore diameter of SPCA before and after MO adsorption .....                                                                 | 23 |
| Table S2. Isotherm model parameters at 303 K .....                                                                                                                 | 23 |
| Table S3. Parameters of first-order pseudokinetic equations, second-order pseudokinetic equations, intra-particle diffusion equations, and Elovich equations ..... | 23 |

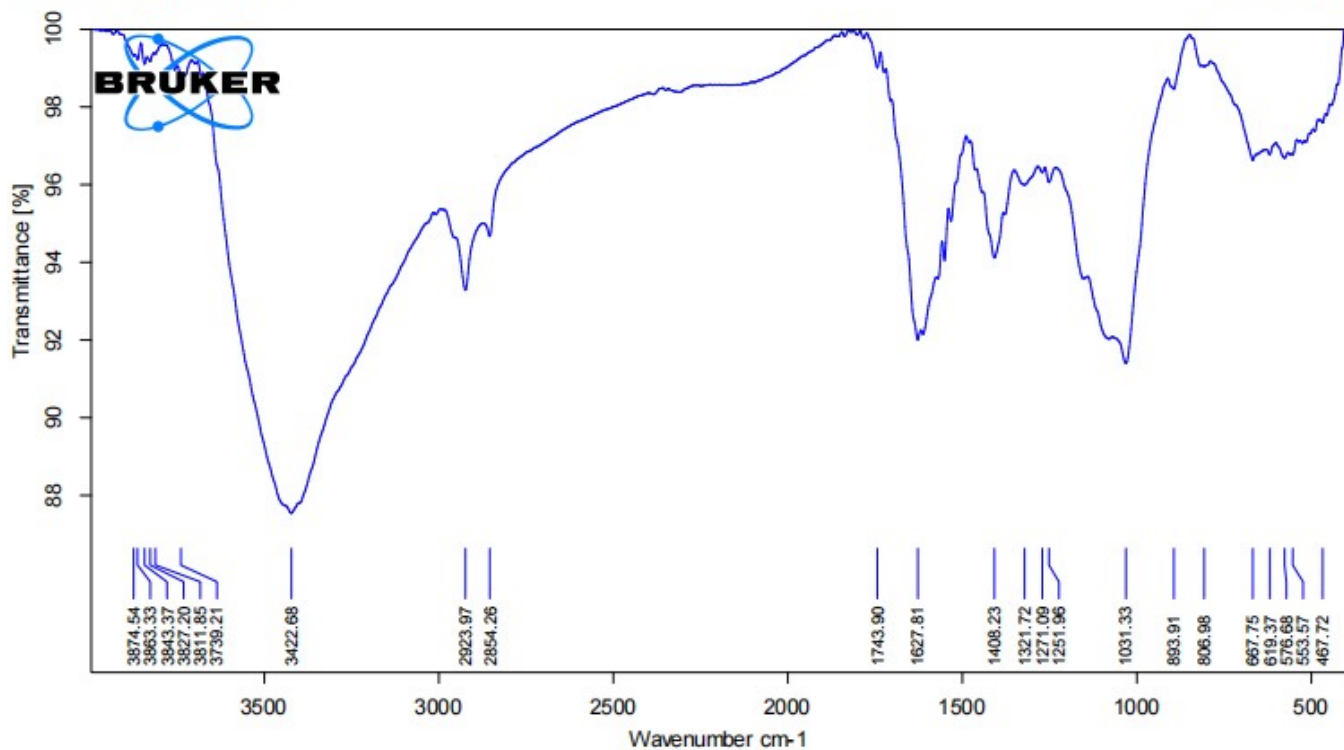

|                                                                      |           |                    |            |
|----------------------------------------------------------------------|-----------|--------------------|------------|
| E:\VIEN 2024\HOA HUU CO - POLYMER\CHI\20241003\SPCAC-SBC\SPCAC-SBC.0 | SPCAC-SBC | BRUKER - TENSOR 27 | 11/10/2024 |
|----------------------------------------------------------------------|-----------|--------------------|------------|

Figure S1. FTIR spectrum of SPCA

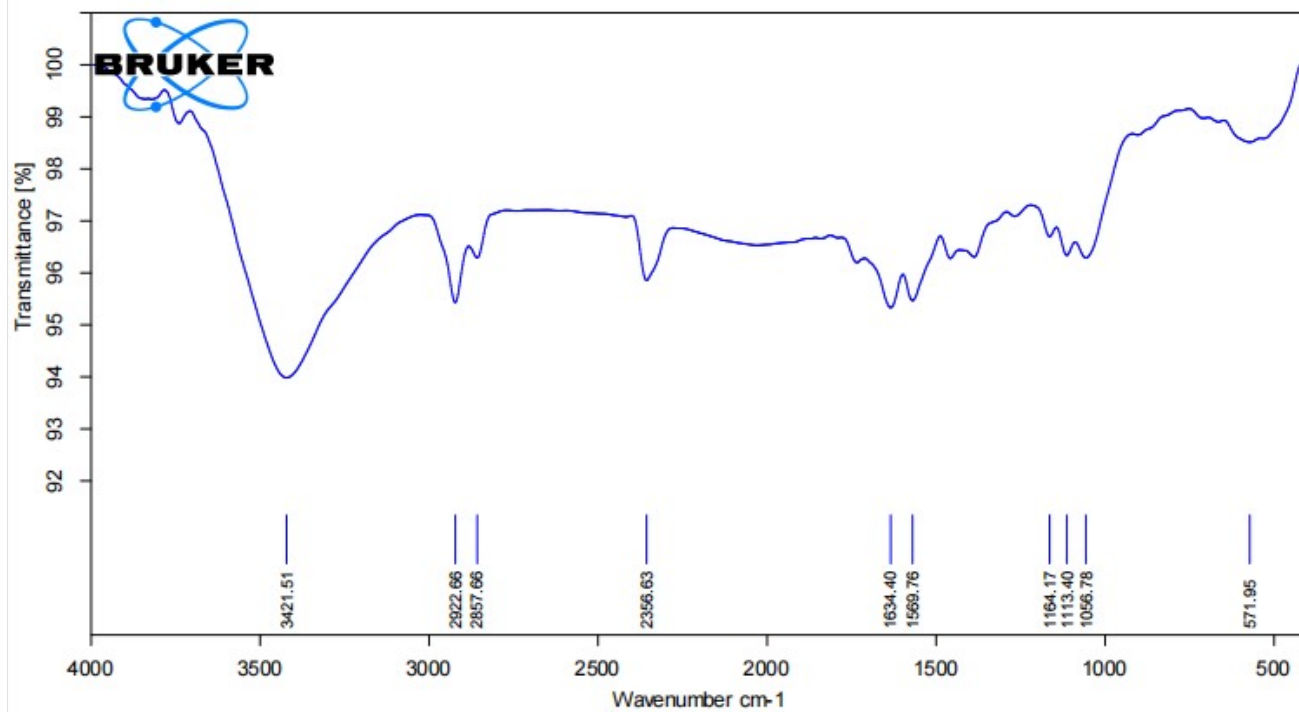

E:\VIEN 2023\CN HOA DUOC\CHI CHI\20230427\than hoat tinh\than hoat tinh.0

than hoat tinh

BRUKER - TENSOR 27

27/04/2023

Figure S2. FTIR spectrum of activated carbon

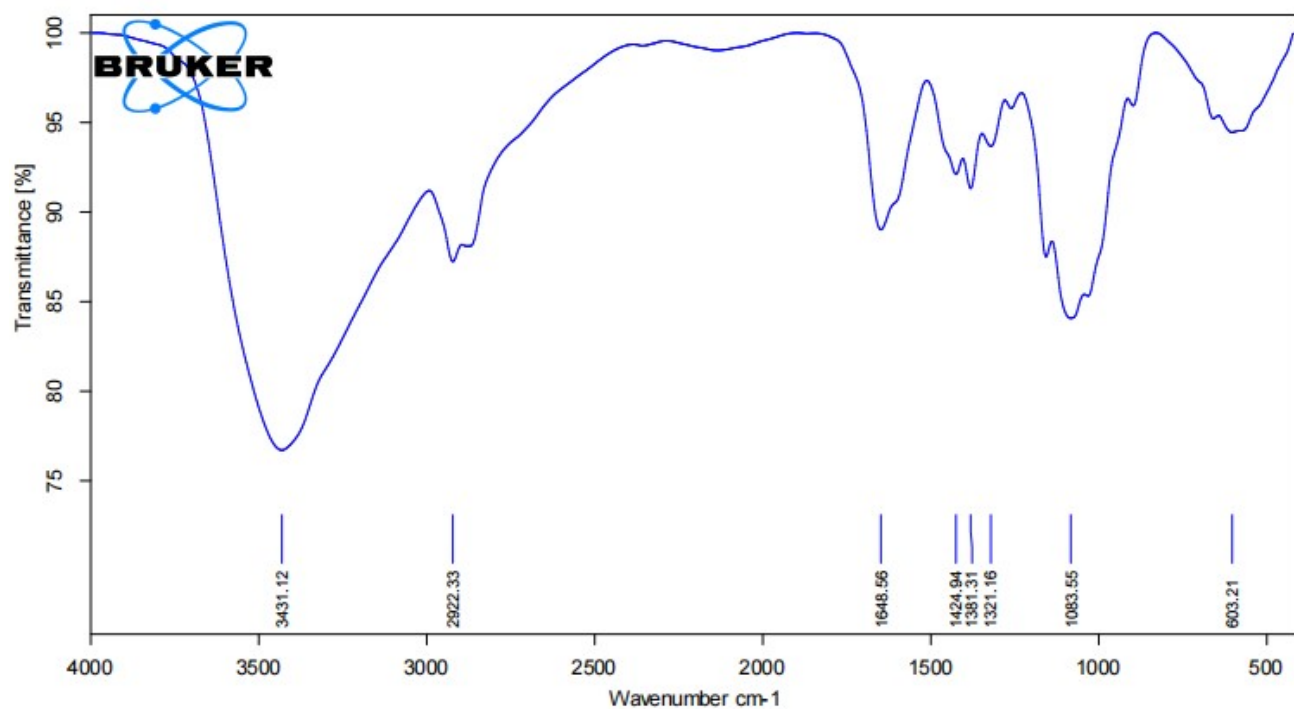

E:\VIEN 2023\CN HOA DUOC\CHI CHI\20230427\chitosan\chitosan.0

chitosan

BRUKER - TENSOR 27

27/04/2023

**Figure S3.** FTIR spectrum of chitosan

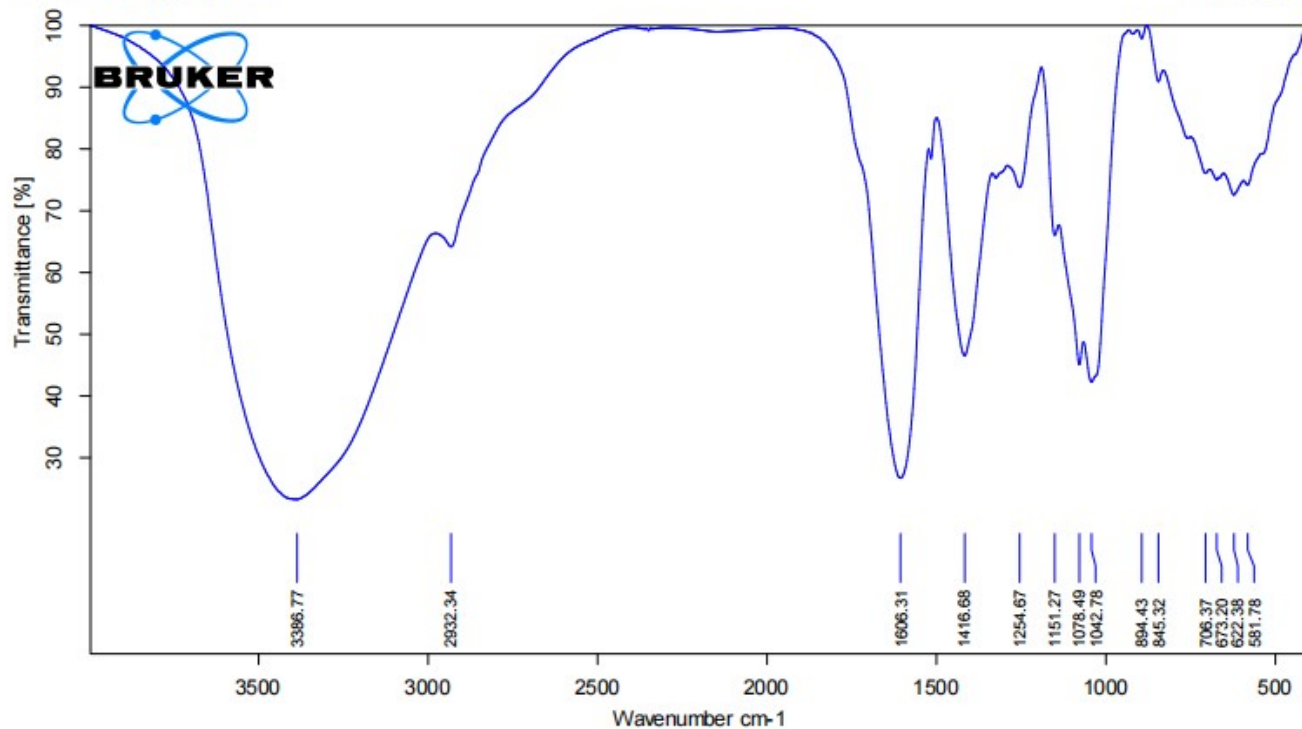

|                                                                                      |                |             |            |
|--------------------------------------------------------------------------------------|----------------|-------------|------------|
| E:\VIEN 2024\HOA HUU CO - POLYMER\AN-CHI CH\20240229\XUONG RONG DAO\XUONG RONG DAO.0 | XUONG RONG DAO | BRUKER - TE | 06/03/2024 |
|--------------------------------------------------------------------------------------|----------------|-------------|------------|

Figure S4. FTIR spectrum of pectin cactus

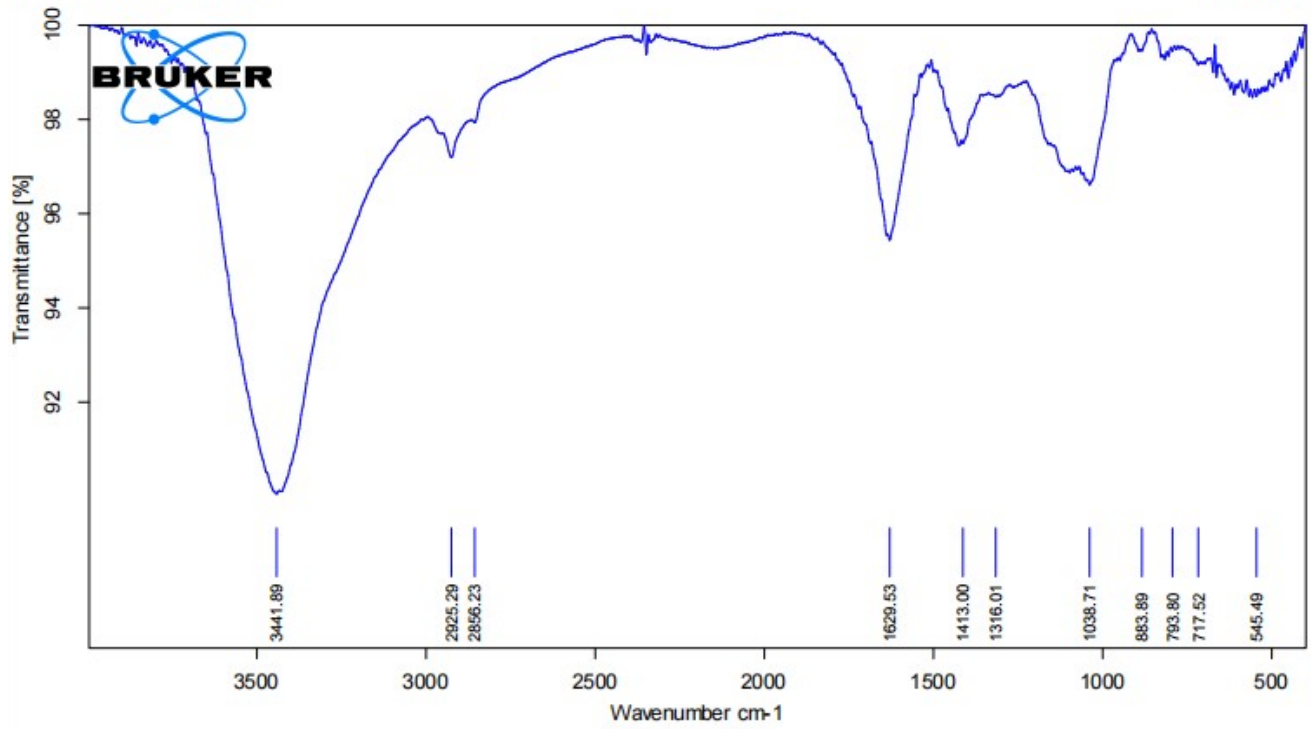

|                                                                           |          |                    |            |
|---------------------------------------------------------------------------|----------|--------------------|------------|
| E:\VIEN 2024\HOA HUU CO - POLYMER\AN-CHI CHI\20240307\Alginate\Alginate.0 | Alginate | BRUKER - TENSOR 27 | 07/03/2024 |
|---------------------------------------------------------------------------|----------|--------------------|------------|

Figure S5. FTIR spectrum of alginate

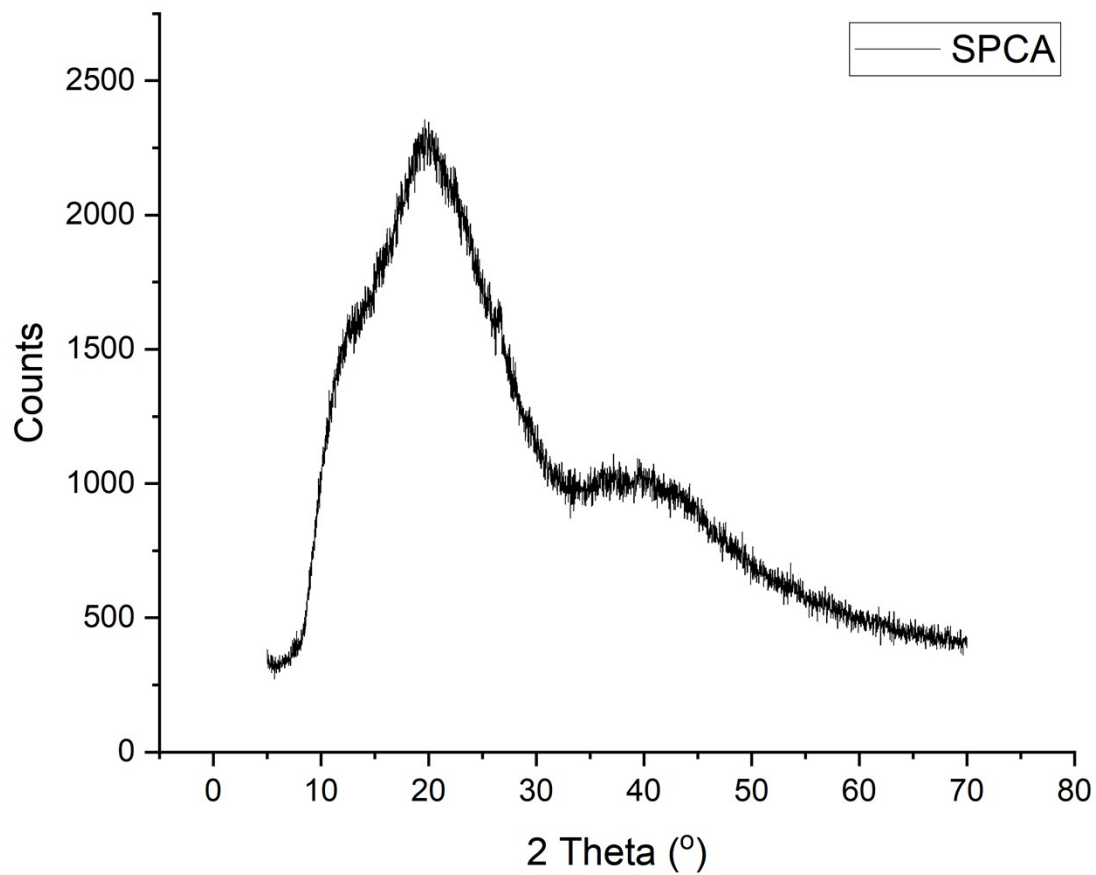

**Figure S6.** X-ray diffraction of SPCA

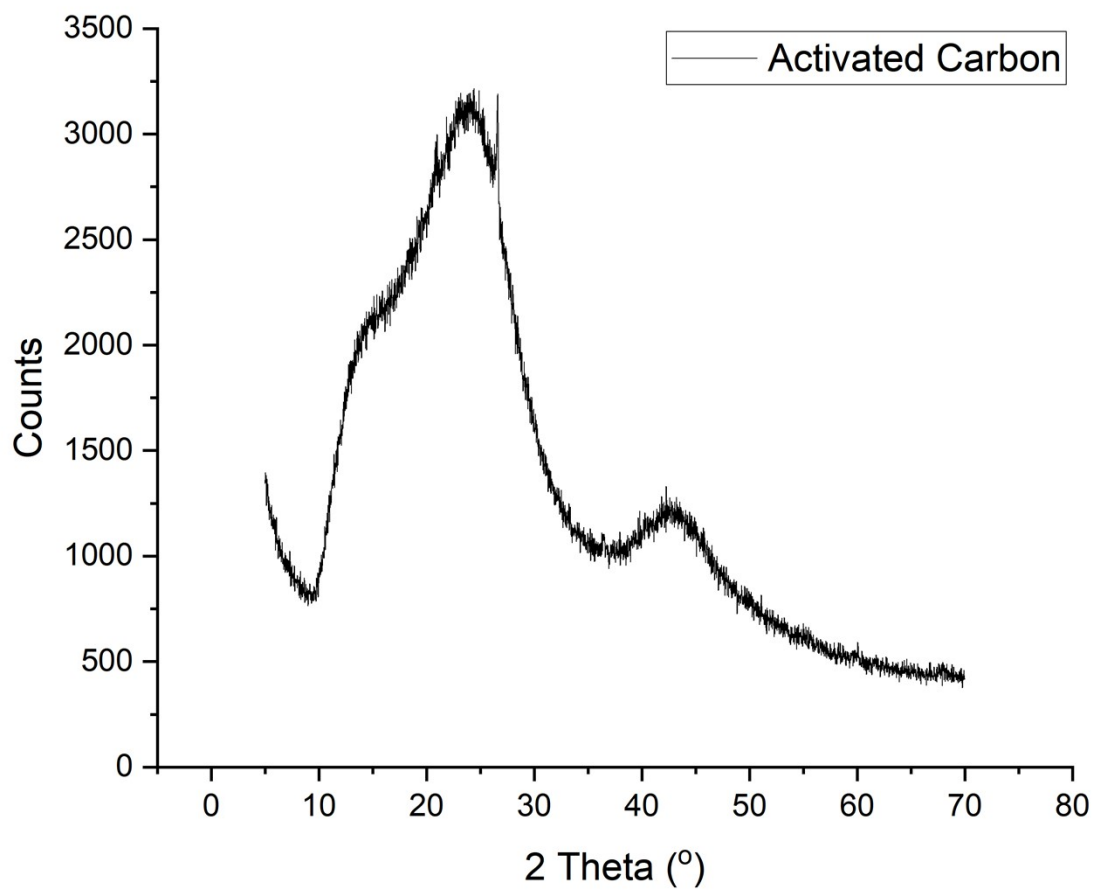

**Figure S7.** X-ray diffraction of activated carbon

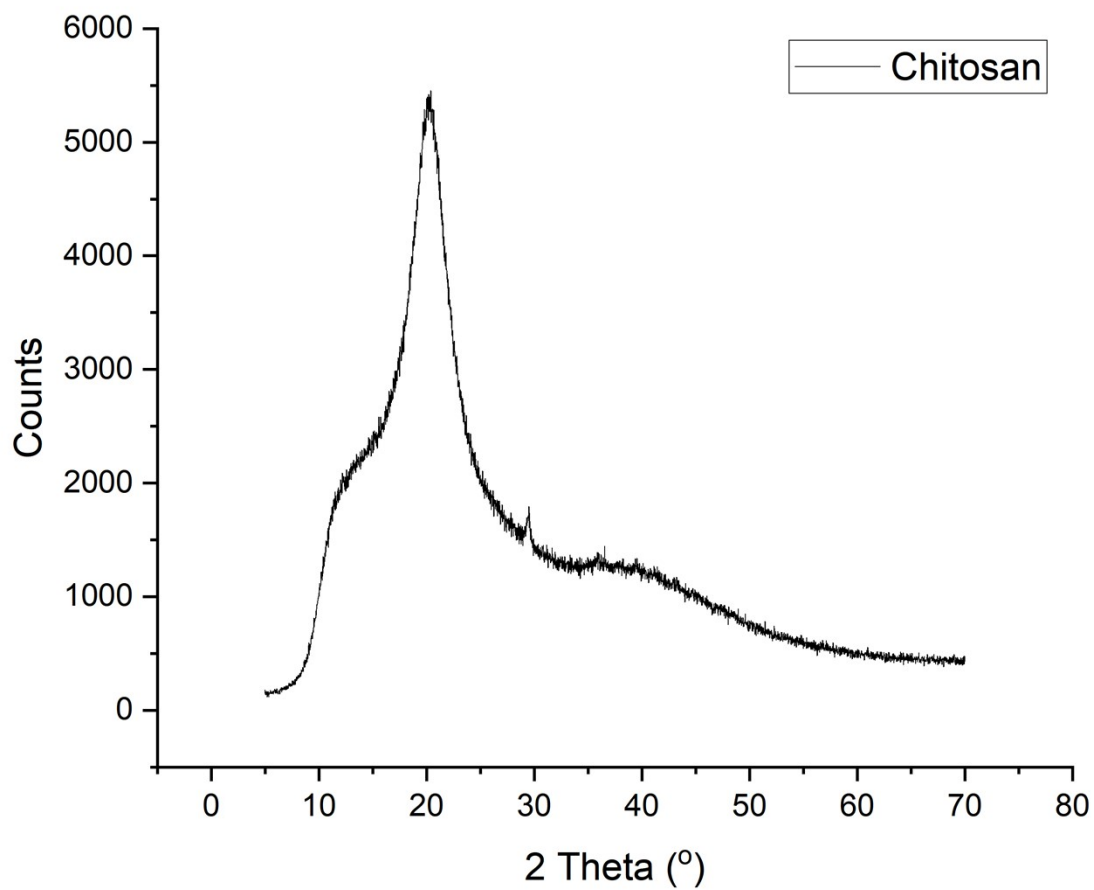

**Figure S8.** X-ray diffraction of chitosan

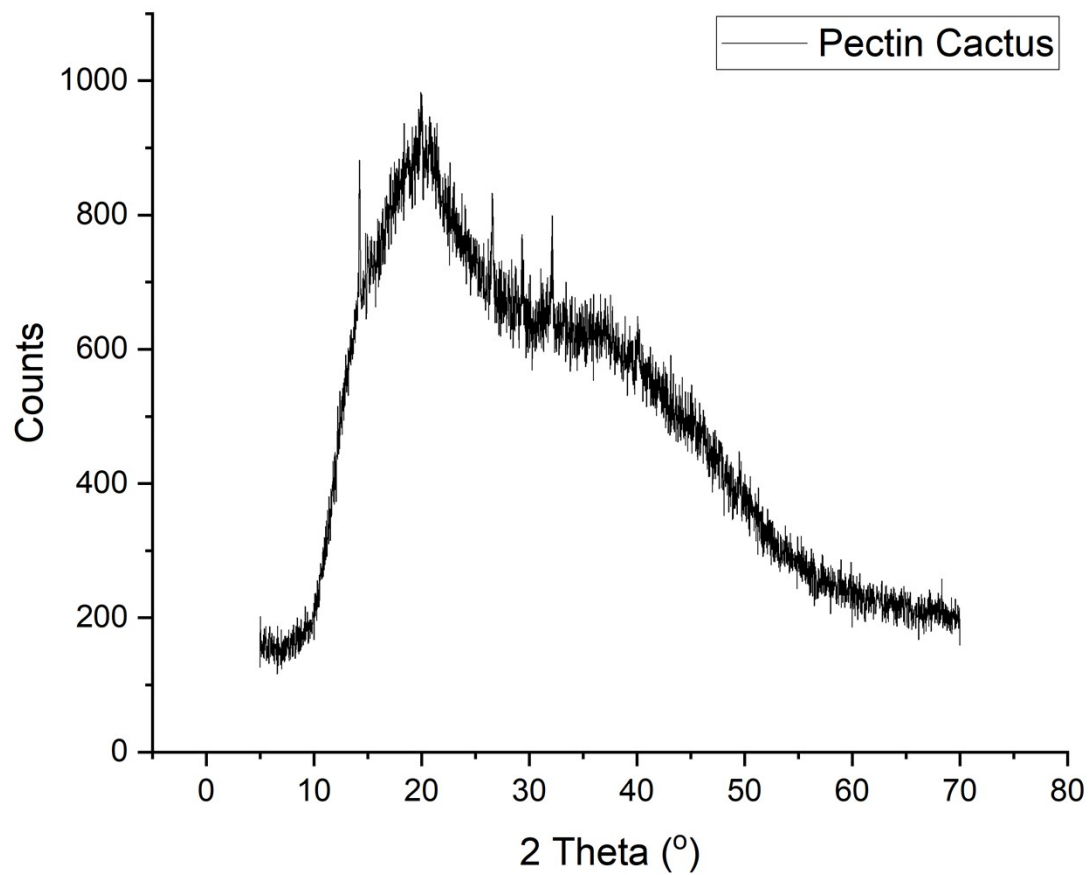

**Figure S9.** X-ray diffraction of pectin cactus

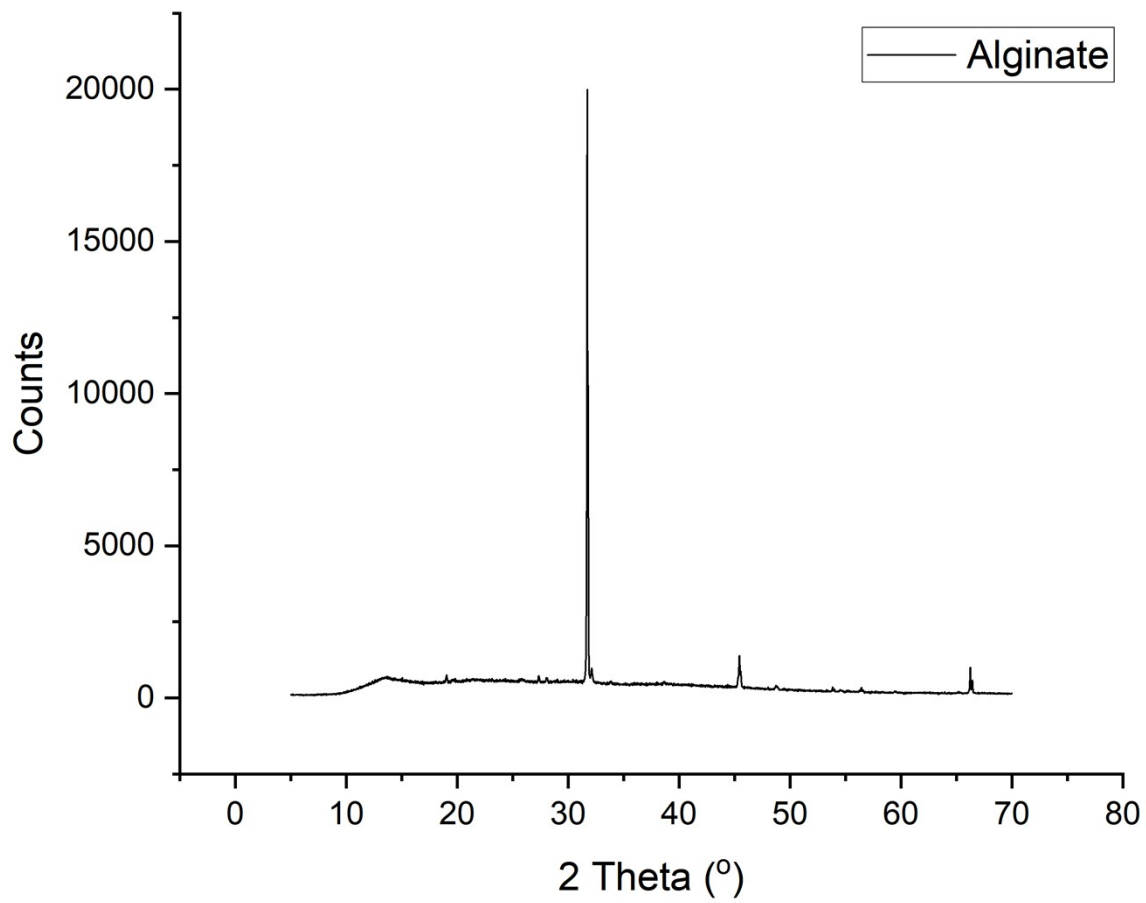

**Figure S10.** X-ray diffraction of alginate

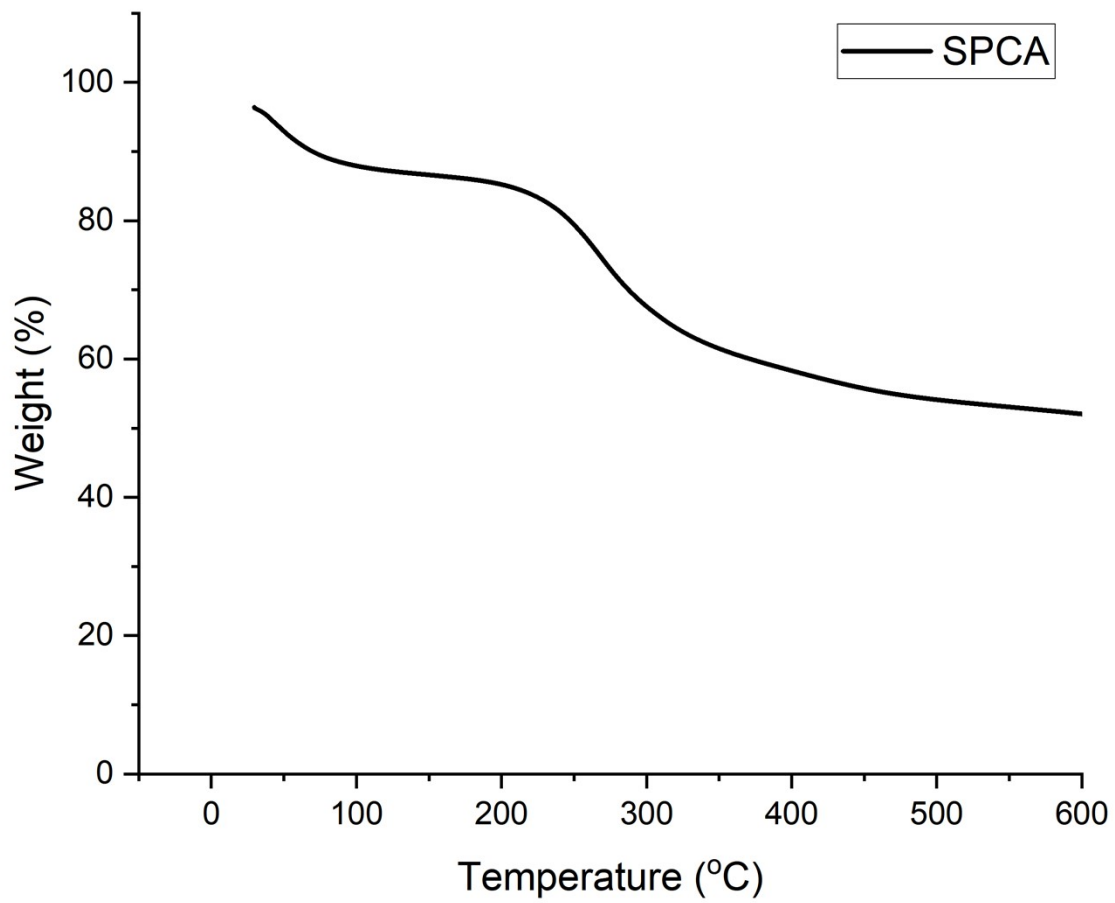

**Figure S11.** TGA of SPCA

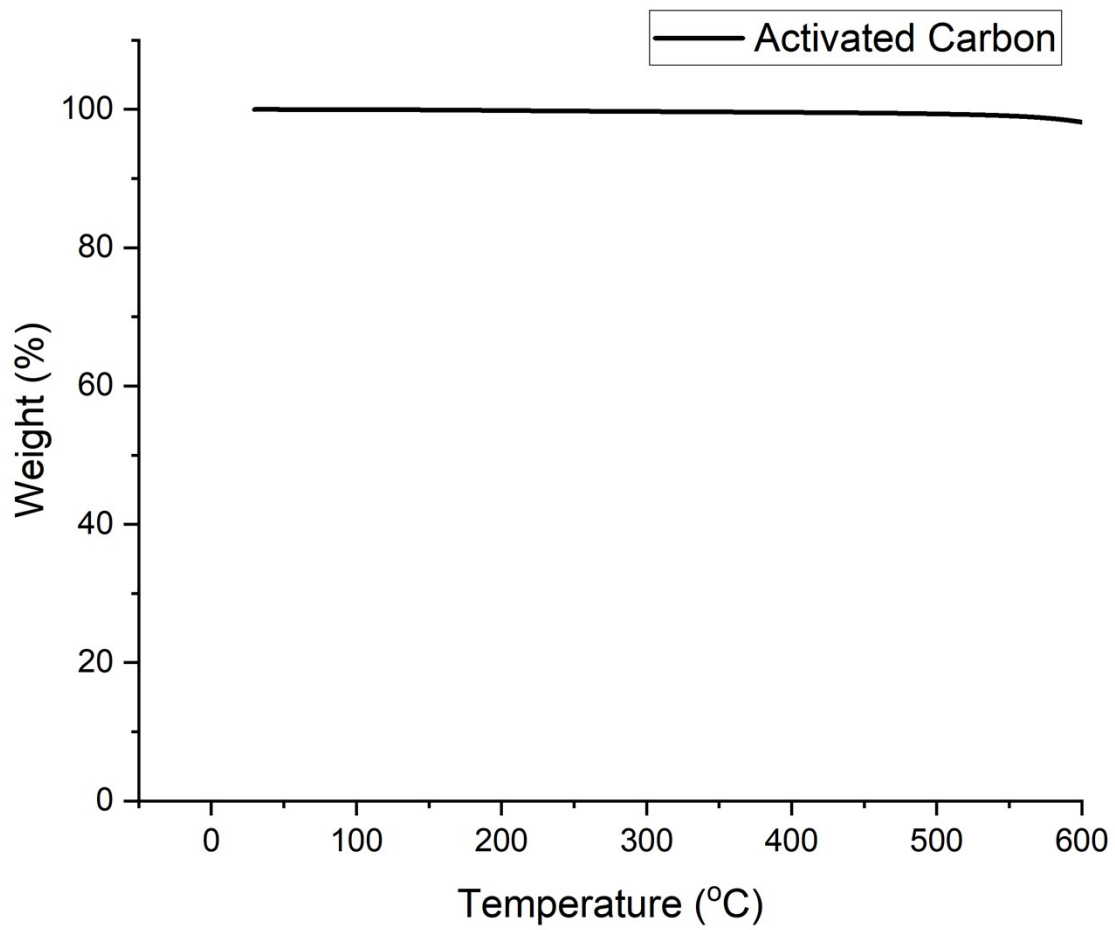

**Figure S12.** TGA of activated carbon

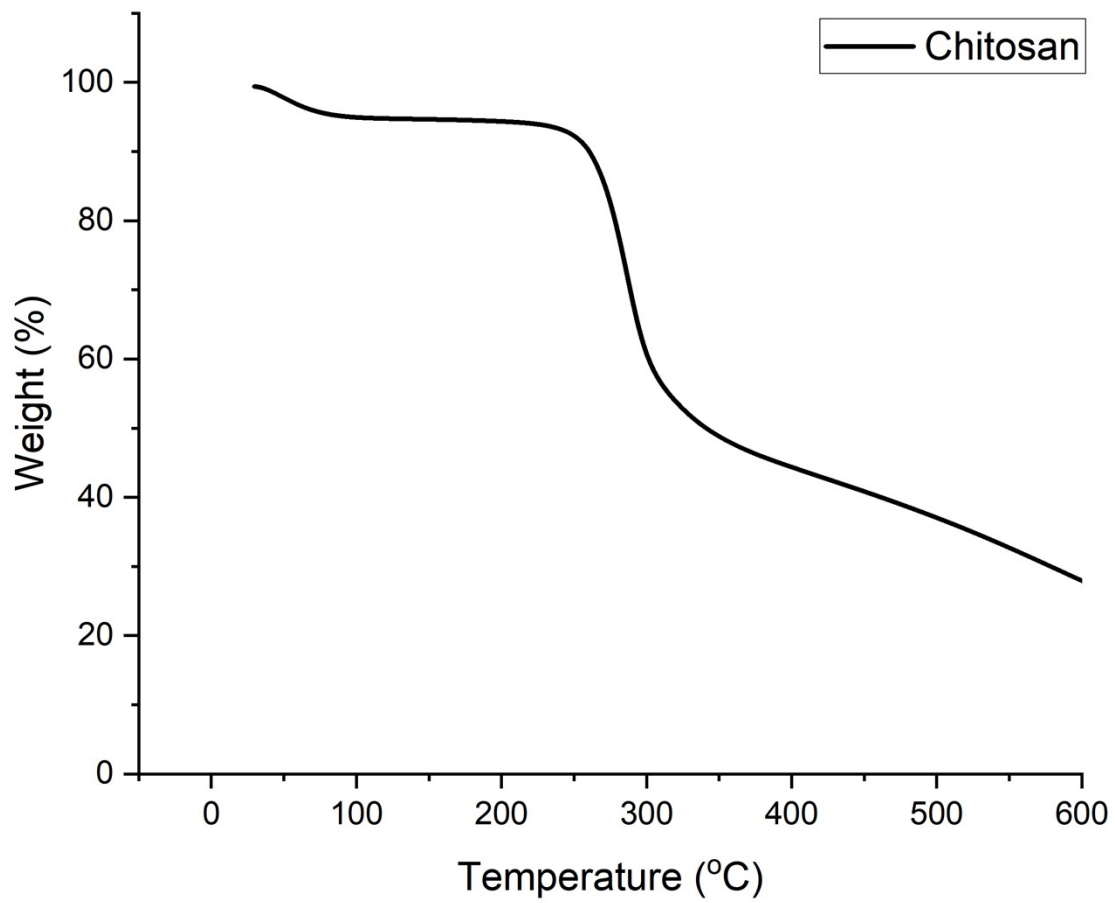

**Figure S13.** TGA of chitosan

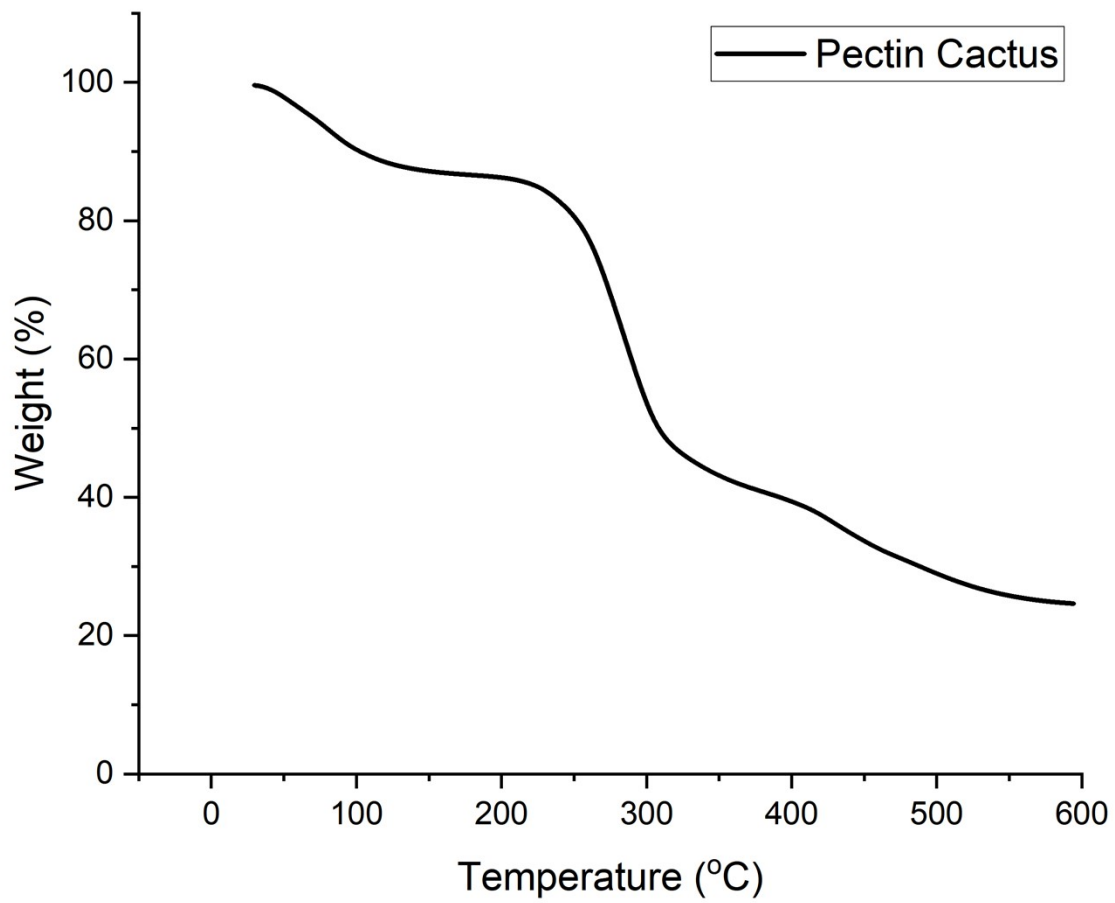

**Figure S14.** TGA of pectin cactus

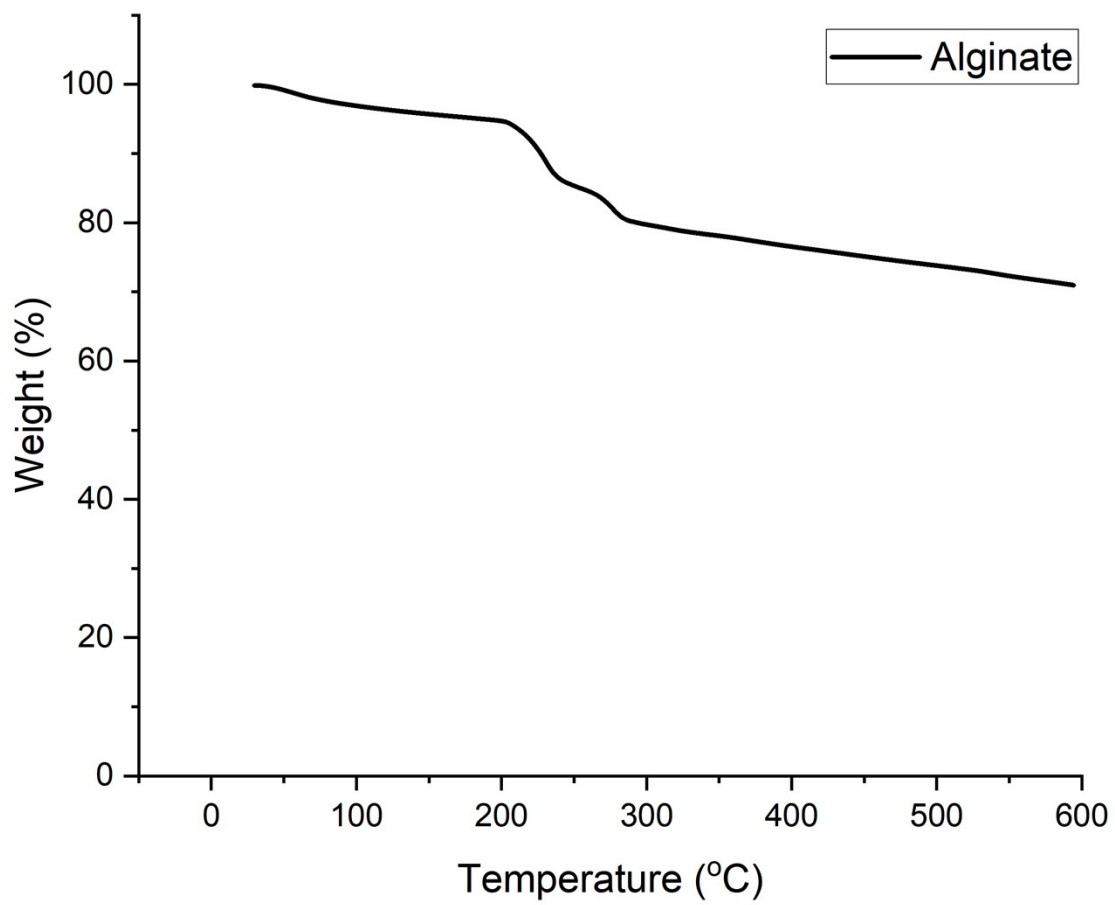

**Figure S15.** TGA of alginate

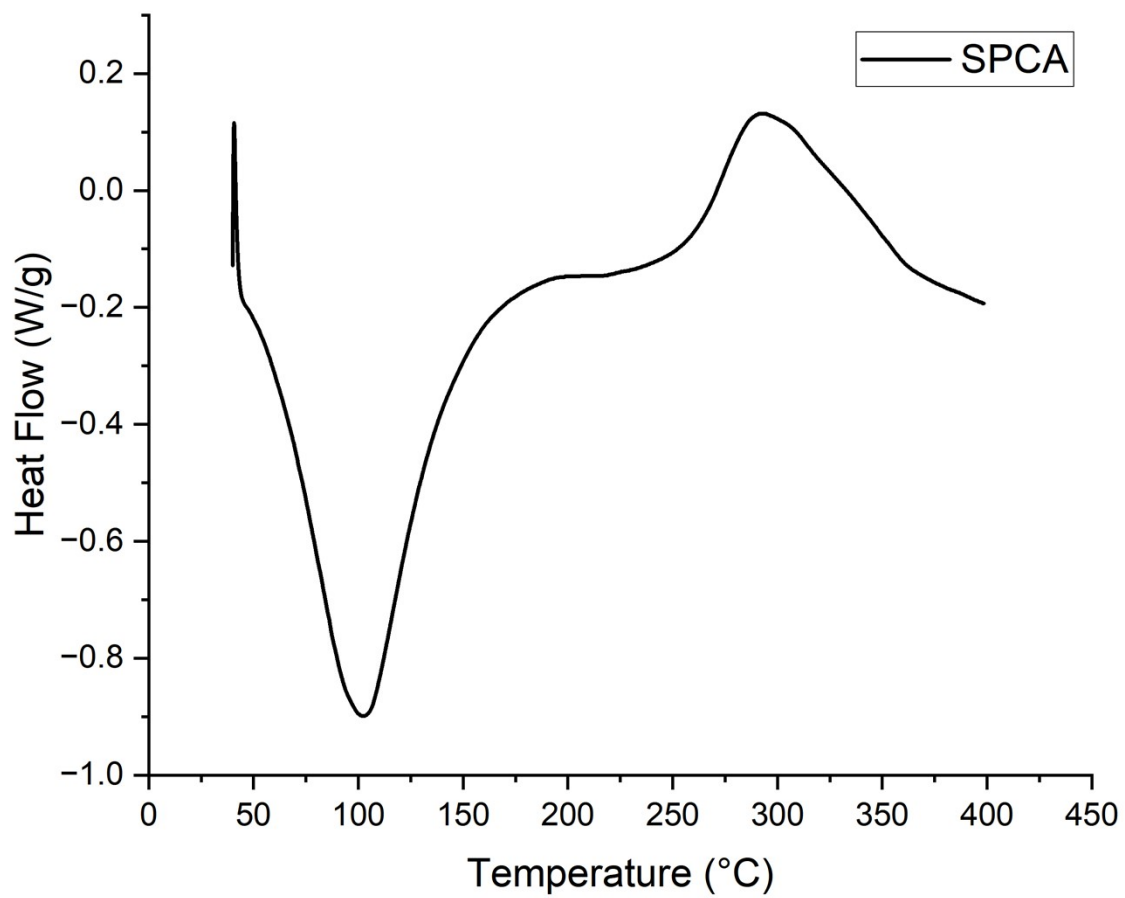

**Figure S16.** DSC of SPCA

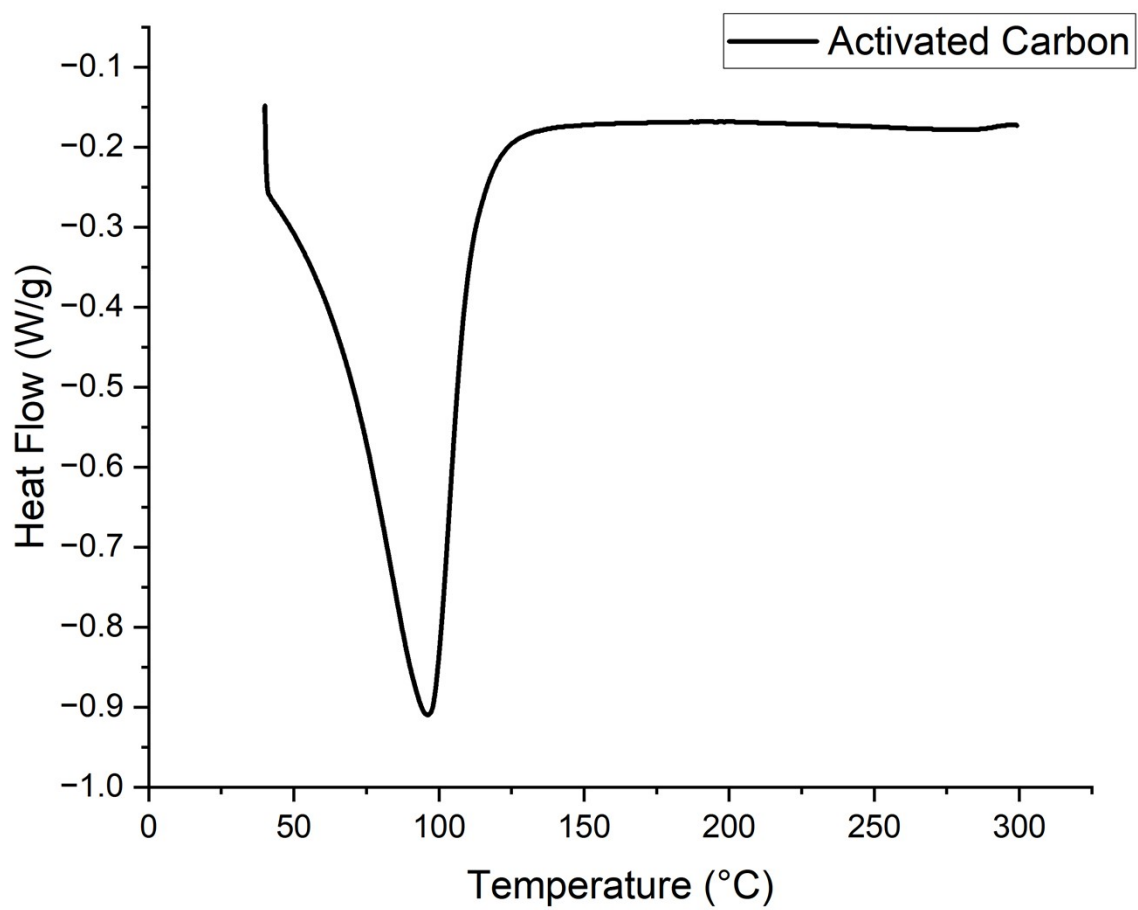

**Figure S17.** DSC of activated carbon

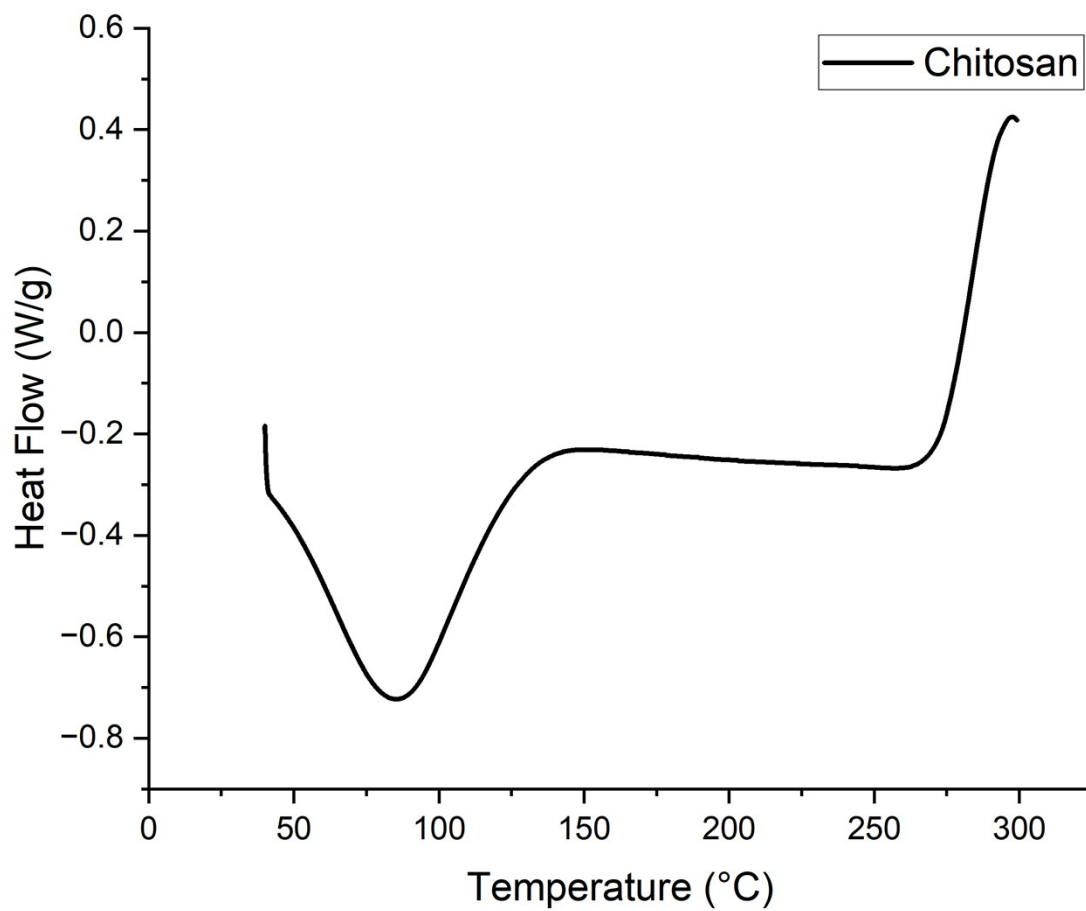

**Figure S18.** DSC of chitosan

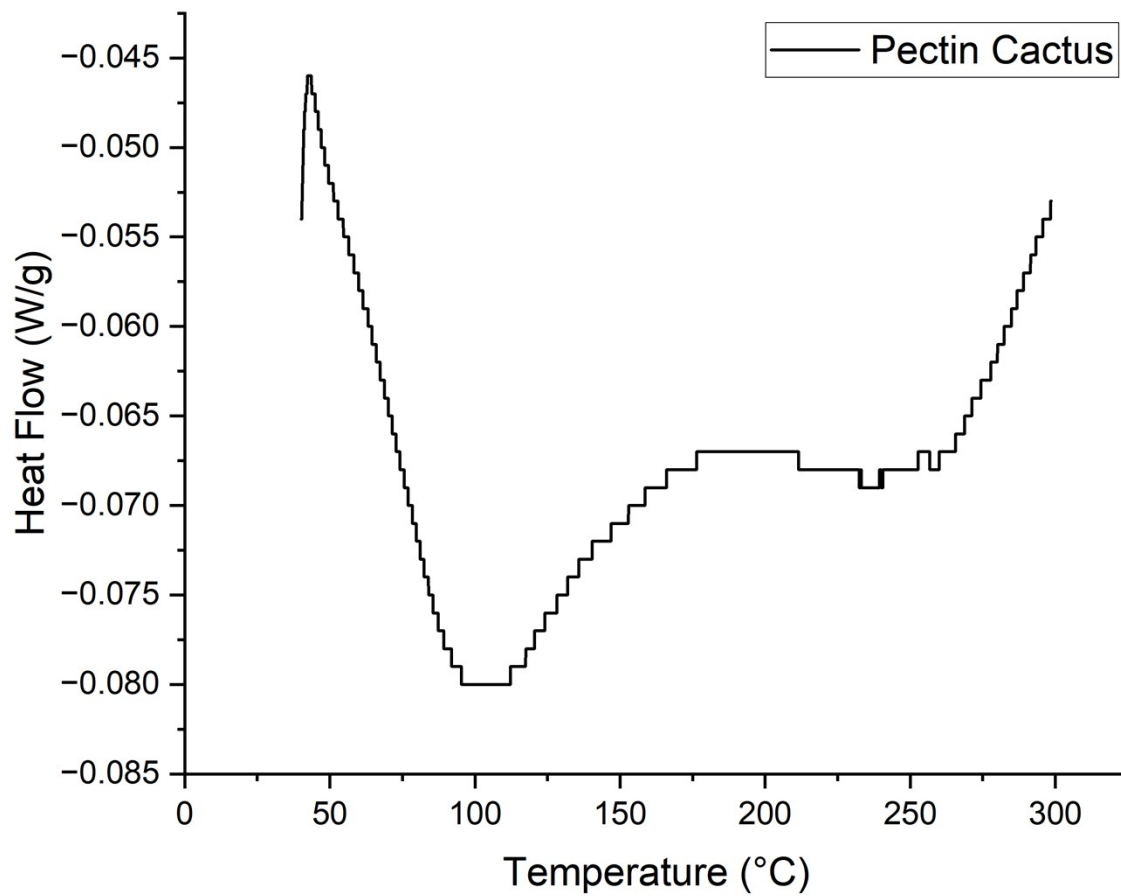

**Figure S19.** DSC of pectin cactus

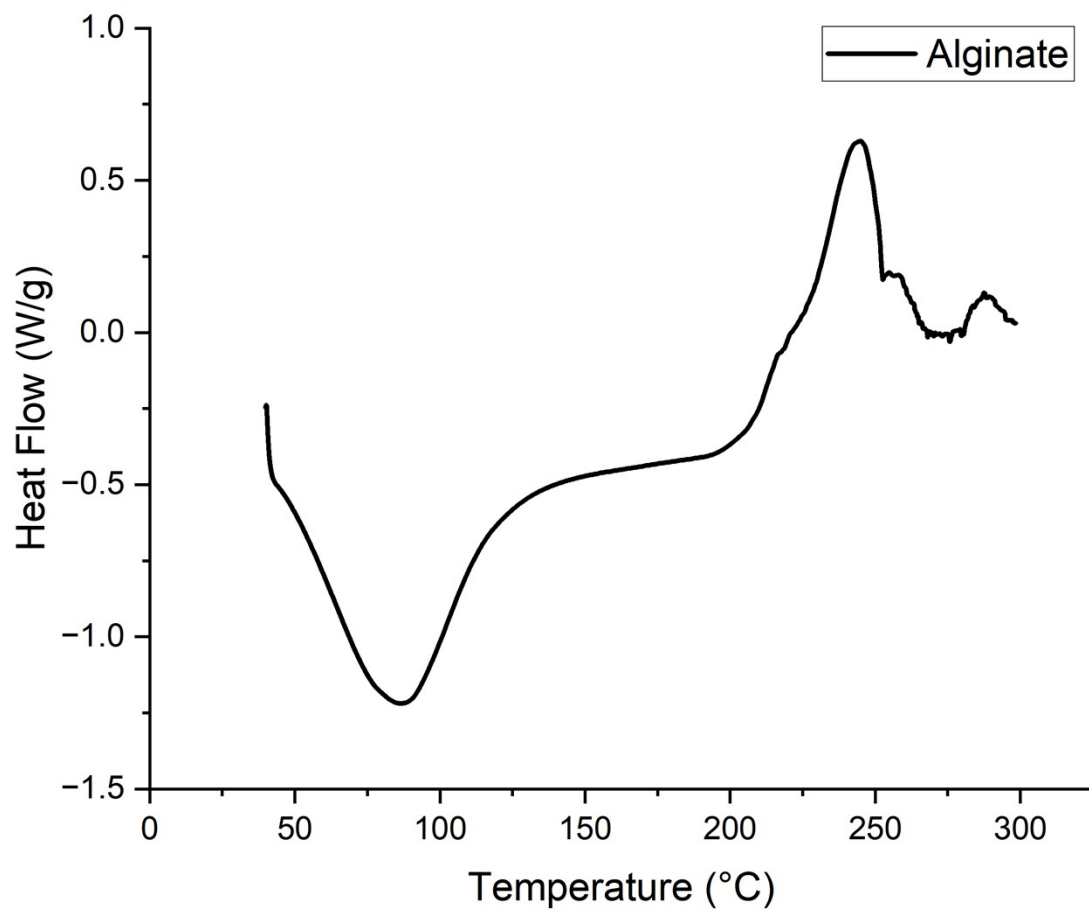

**Figure S20.** DSC of alginate

**Table S1.** Surface area, pore volume and pore diameter of SPCA before and after MO adsorption

| Sample                           |                           | Before MO adsorption | After MO adsorption |
|----------------------------------|---------------------------|----------------------|---------------------|
| Surface area (m <sup>2</sup> /g) |                           | 255.878              | 254.213             |
| Pore volume (cm <sup>3</sup> /g) | N <sub>2</sub> adsorption | 0.119                | 0.099               |
|                                  | N <sub>2</sub> desorption | 0.178                | 0.159               |
| Average pore diameter (Å)        | N <sub>2</sub> adsorption | 25.45                | 22.17               |
|                                  | N <sub>2</sub> desorption | 19.33                | 17.12               |

**Table S2.** Isotherm model parameters at 303 K

| Parameters | Langmuir       |                  |                | Freundlich     |      |                | Temkin         |                |                |
|------------|----------------|------------------|----------------|----------------|------|----------------|----------------|----------------|----------------|
|            | K <sub>L</sub> | q <sub>max</sub> | R <sup>2</sup> | K <sub>F</sub> | n    | R <sup>2</sup> | B <sub>T</sub> | A <sub>t</sub> | R <sup>2</sup> |
| T = 303 K  | 0.40           | 21.46            | 0.9911         | 6.66           | 2.47 | 0.9945         | 4.20           | 4.98           | 0.9779         |

**Table S3.** Parameters of first-order pseudokinetic equations, second-order pseudokinetic equations, intra-particle diffusion equations, and Elovich equations

| Parameters                              | PFO model            |                              |                | q <sub>e</sub> , reality | PSO model               |                              |                |
|-----------------------------------------|----------------------|------------------------------|----------------|--------------------------|-------------------------|------------------------------|----------------|
|                                         | K <sub>1</sub> (1/h) | q <sub>e</sub> , calculation | R <sup>2</sup> |                          | K <sub>2</sub> (g/mg.h) | q <sub>e</sub> , calculation | R <sup>2</sup> |
| 100 ppm                                 | 1.35                 | 7.26                         | 0.9856         | 9.51                     | 0.22                    | 10.42                        | 0.9985         |
| Intraparticle diffusion model           |                      |                              |                | Elovich model            |                         |                              |                |
| K <sub>p</sub> (mg/g.h <sup>0.5</sup> ) |                      | C (mg/g)                     | R <sup>2</sup> | α (mg/g.h)               |                         | β (g/mg)                     | R <sup>2</sup> |
| 2.03                                    |                      | 5.74                         | 0.8361         | 234.43                   |                         | 0.6621                       | 0.9020         |
